1 **Non-random sister chromatid segregation mediates rDNA copy number maintenance in**  
2 ***Drosophila***

3

4 George J. Watase<sup>1,2</sup> and Yukiko M. Yamashita<sup>1,2,\*</sup>

5

6 <sup>1</sup> Whitehead Institute for Biomedical Research, Department of Biology, Massachusetts Institute  
7 of Technology, <sup>2</sup> Howard Hughes Medical Institute, 455 Main Street, Cambridge, MA 02142

8

9 \*Corresponding author: [yukikomy@wi.mit.edu](mailto:yukikomy@wi.mit.edu)

10

11

12 **Abstract (125 words)**

13 **Although considered to be exact copies of each other, sister chromatids can segregate**  
14 **non-randomly in some cases. For example, sister chromatids of the X and Y**  
15 **chromosomes segregate non-randomly during asymmetric division of male germline**  
16 **stem cells (GSCs) in *D. melanogaster*. Here we identify that the ribosomal DNA (rDNA)**  
17 **loci, which are located on the X and Y chromosomes, and an rDNA-binding protein,**  
18 **Indra, are required for non-random sister chromatid segregation (NRSS). We provide**  
19 **the evidence that NRSS is a mechanism by which GSCs recover rDNA copy number,**  
20 **which occurs through unequal sister chromatid exchange, counteracting the spontaneous**  
21 **copy number loss that occurs during aging. Our study reveals an unexpected role for**  
22 **NRSS in maintaining germline immortality through maintenance of a vulnerable**  
23 **genomic element, rDNA.**

24

25 **One Sentence Summary (125 characters)**

26 rDNA copy number maintenance by non-random sister chromatid segregation contributes to  
27 germline immortality in *Drosophila*

28

29 Sister chromatids, generated through the precise process of DNA replication, are  
30 considered identical. Nevertheless, it has been proposed that sister chromatids might carry  
31 distinct information or mutation loads, and their non-random segregation may underlie  
32 asymmetric cell division (1-3). However, the underlying mechanism remains elusive, preventing  
33 investigation of the physiological relevance of non-random sister chromatid segregation (NRSS).  
34 Using *D. melanogaster* male germline stem cells (GSCs) as a model system, where asymmetric  
35 stem cell division can be observed at single cell resolution, we previously showed that the X and  
36 Y chromosomes exhibit strikingly biased sister chromatid segregation (4). By using  
37 chromosome-orientation fluorescence *in situ* hybridization (CO-FISH) with chromosome-  
38 specific probes (Fig. 1A), (+)-strand templated vs. (-)-strand templated sister chromatids of each  
39 chromosome can be differentiated (Fig. 1A and B). If sister chromatids are equivalent, (+)- vs.  
40 (-)-strand templated sister chromatids would segregate to the GSC or GB (gonialblast, the  
41 differentiating daughter of a GSC) at random (50:50). Although we observed random sister

42 chromatid segregation for autosomes (chromosome 2 and 3), the X and Y chromosomes  
43 segregated their sister chromatids non-randomly, with a specific strand segregating to GSC in  
44 ~80% of observed divisions (Fig. 1C, ‘red strand’)(4). This demonstrated that sister chromatids,  
45 which supposedly carry the same genetic information, can be distinguished and segregated non-  
46 randomly during asymmetric stem cell division.

47

48 To elucidate the underlying molecular mechanism of NRSS, we sought to identify the  
49 chromosomal loci that mediate NRSS and found that ribosomal DNA (rDNA) is required. An  
50 X chromosome without rDNA, *Df(1)bb<sup>158</sup>* (*bb<sup>158</sup>* hereafter), as well as a Y chromosome  
51 without rDNA (*Ybb<sup>-</sup>*), exhibited randomized sister chromatid segregation (Fig. 1C, table S1).  
52 Importantly, the intact Y chromosome in the *bb<sup>158</sup>* strain, as well as the intact X chromosome  
53 in the *Ybb<sup>-</sup>* strain, still exhibited NRSS (Fig. 1C, table S1), suggesting that the rDNA loci  
54 likely act as cis-elements to mediate NRSS. A chromosome 2 containing an rDNA locus  
55 translocated from the Y chromosome also exhibited NRSS (‘2<sup>Y</sup> with rDNA’ in T(Y;2)A77  
56 translocation, Fig. 1D, table S2), suggesting that rDNA is sufficient to induce NRSS. As a  
57 critical control, a chromosome 2 carrying a similar translocation from the Y chromosome that  
58 does not include the rDNA did not exhibit NRSS (‘2<sup>Y</sup> without rDNA’ in T(Y;2)P8  
59 translocation, Fig. 1D, table S2). This is the first demonstration that a specific region of a  
60 chromosome is responsible for NRSS, opposing the widely-held speculation that NRSS  
61 depends on chromosome-wide information such as epigenetic information and replication-  
62 induced mutations (5).

63

64 To understand how rDNA mediates NRSS, we isolated rDNA binding proteins from the  
65 GSC extract. Each rDNA locus consists of 150-225 repeated rDNA units in order to support the  
66 high demand of ribosome biogenesis (6). Each rDNA unit contains the 18S, 5.8S/2S, 28S rRNA  
67 genes and three spacer sequences [the external transcribed spacer (ETS), internal transcribed  
68 spacer (ITS) and intergenic spacer (IGS)] (Fig. 2A). Interestingly, the Y chromosome of *D.*  
69 *simulans*, a species closely related to *D. melanogaster*, has IGS repeats but no rRNA genes, ETS  
70 or ITS (7), yet exhibited NRSS (fig. S1, table S1). We hypothesized that IGS may be responsible  
71 for NRSS. Thus, we isolated IGS-binding proteins by mass spectrometry followed by a  
72 secondary screen based on subcellular localization (Fig. 2B, table S3). In this study, we focus on

73 a previously-uncharacterized zinc finger protein, CG2199, which we named Indra after the  
74 Hindu god who lost immortality due to a curse from Durvasa. Using a specific anti-Indra  
75 antibody (fig. S2A) and an Indra-GFP line, we found that Indra localizes to the nucleolus (the  
76 site of rDNA transcription) in interphase (Fig. 2C, fig. S3A) and rDNA loci during metaphase  
77 (Fig. 2D, fig. S3B). ChIP-qPCR further demonstrated that Indra preferentially binds to IGS (Fig.  
78 2E). Strikingly, RNAi-mediated knockdown of *indra* in the germline (fig. S2A) compromised  
79 NRSS for both the X and Y chromosomes (Fig. 2F, table S4). Taken together, these results show  
80 that IGS and its binding protein Indra mediate NRSS.

81  
82 We found that *indra* is required for rDNA copy number maintenance. RNAi-mediated  
83 depletion of *indra* (*nos-gal4>UAS-indra<sup>TriP.HMJ30228</sup>*) resulted in drastically fewer progeny  
84 compared to control (Fig. 3A, P<sub>0</sub>). Some of the offspring from *indra<sup>TriP.HMJ30228</sup>* males exhibited a  
85 *bobbed* phenotype, a hallmark of rDNA copy number insufficiency characterized by abnormal  
86 cuticle patterns on the abdomen (Fig. 3B; (8)). The frequency of *bobbed* flies increased when the  
87 Y chromosome from *indra<sup>TriP.HMJ30228</sup>* fathers was placed in the background of *bb<sup>158</sup>*, the X  
88 chromosome that lacks rDNA (Fig. 3B). Quantitative droplet digital PCR (ddPCR) confirmed  
89 that rDNA copy number was reduced in *indra<sup>TriP.HMJ30228</sup>* animals (Fig. 3C, P<sub>0</sub>). Depletion of  
90 *indra* over successive generations resulted in a progressive loss of fecundity (Fig. 3A, F<sub>1</sub>-F<sub>2</sub>)  
91 associated with a reduction in rDNA copy number (Fig. 3C, F<sub>1</sub>-F<sub>2</sub>). Moreover, *indra* is required  
92 for ‘rDNA magnification’, a phenomenon by which an X chromosome with insufficient rDNA  
93 copy number is induced to recover copy number, when the fly lacks rDNA on the Y  
94 chromosome (*Ybb<sup>-</sup>*) (Fig. 3, D and E, fig. S4; (9)). These results suggest that *indra* is required for  
95 rDNA copy number maintenance over generations.

96  
97 Although the repetitiveness of rDNA loci is critical to support ribosome biogenesis, it  
98 also makes rDNA loci susceptible to intrachromatid recombination, which leads to spontaneous  
99 copy number loss (Fig. 4A). To maintain the integrity of rDNA loci, copy number loss must be  
100 counteracted by copy number recovery. In yeast, rDNA copy number recovery is mediated by  
101 unequal sister chromatid recombination (10). Similarly, rDNA magnification, which we  
102 postulated to mediate rDNA copy number recovery in the *Drosophila* male germline (11), is  
103 proposed to utilize unequal sister chromatid exchange (USCE) (9). USCE allows for copy

104 number recovery on one of the sister chromatids at the expense of the other (Fig. 4B; (9)),  
105 generating asymmetry between two sister chromatids (Fig. 4B). We hypothesized that this  
106 asymmetry may underlie NRSS.

107  
108 Strikingly, asymmetry in rDNA amount was detected during anaphase in GSCs under  
109 ‘magnifying conditions’ ( $bb^{z9}/Ybb^{-}$ ) with the GSCs preferentially inheriting the stronger signal  
110 (Fig. 4, D and E). As an important control, asymmetry in rDNA amount was not observed in flies  
111 with sufficient rDNA copy number (Fig. 4, C and E). Interestingly, there were rare cases where  
112 rDNA asymmetry was created, but the stronger signal was inherited by the GBs (Fig. 4E, top  
113 panel). Plotting the ratio of stronger over weaker rDNA signal (Fig. 4E, bottom panel) suggests  
114 that the magnifying condition strongly induced USCE. rDNA copy number and segregation  
115 asymmetries were absent under magnifying conditions following depletion of *indra* (Fig. 4E),  
116 suggesting that *indra* may be involved not only in NRSS but also in generating copy number  
117 asymmetry through USCE.

118  
119 These results are consistent with a model in which rDNA magnification is mediated by  
120 USCE, and the sister chromatid with increased rDNA copy number is selectively retained by  
121 GSCs by NRSS. We further tested this idea by using additional CO-FISH probes. The probe for  
122 the 359-bp repeat, located proximal to the rDNA (Fig. 4F), was used to detect NRSS in the  
123 experiments described above. (TAGA)<sub>n</sub>, which is located distal to the rDNA, also exhibited  
124 NRSS in control (non-magnifying) conditions (Fig. 4G, table S5). Strikingly, under magnifying  
125 conditions, 359-bp maintained NRSS but (TAGA)<sub>n</sub> exhibited random segregation, suggesting  
126 that sister chromatid exchange occurred between 359-bp and (TAGA)<sub>n</sub>, most likely within the  
127 rDNA locus (Fig. 4F). Taken together, these data suggest that GSCs undergo rDNA  
128 magnification through USCE followed by NRSS (see Supplementary text).

129  
130 Our study reveals the unexpected molecular mechanisms and biological significance of  
131 NRSS. We propose that NRSS is a key process to recover and maintain inherently unstable  
132 rDNA copy numbers such that the integrity of the germline genome is upheld over generations,  
133 supporting germline immortality. Future work is required to understand how rDNA copy number

134 differences between sister chromatids are recognized and faithfully segregated to the GSCs to  
135 achieve rDNA copy number recovery.

136

### 137 **Competing interests**

138 The authors declare no competing interests.

139

### 140 **Acknowledgements**

141 We thank the Bloomington, Kyoto, and National Drosophila Species Stock Centers, the Vienna  
142 Drosophila Resource Center and the Developmental Studies Hybridoma Bank for reagents. We  
143 thank the Yamashita lab members, Drs. Swathi Yadlapalli and Sue Hammoud, and the Life  
144 Science Editors for comments on the manuscript. We thank MS Bioworks for mass-spectrometry  
145 analysis and the laboratories of Drs. Stephen Weiss and Jiandie Lin for sharing equipment. This  
146 research was supported by Howard Hughes Medical Institute.

147

### 148 **Author contributions**

149 G.W. and Y. Y. designed and conducted experiments, interpreted results and wrote and edited  
150 the manuscript.

151

### 152 **References**

- 153 1. P. M. Lansdorp, Immortal strands? Give me a break. *Cell* **129**, 1244-1247 (2007).
- 154 2. T. A. Rando, The immortal strand hypothesis: segregation and reconstruction. *Cell* **129**,  
155 1239-1243 (2007).
- 156 3. S. Tajbakhsh, C. Gonzalez, Biased segregation of DNA and centrosomes: moving  
157 together or drifting apart? *Nat Rev Mol Cell Biol* **10**, 804-810 (2009).
- 158 4. S. Yadlapalli, Y. M. Yamashita, Chromosome-specific nonrandom sister chromatid  
159 segregation during stem-cell division. *Nature* **498**, 251-254 (2013).
- 160 5. S. Tajbakhsh, Stem cell identity and template DNA strand segregation. *Curr Opin Cell*  
161 *Biol* **20**, 716-722 (2008).
- 162 6. R. S. Hawley, C. H. Marcus, Recombinational controls of rDNA redundancy in  
163 *Drosophila*. *Annu Rev Genet* **23**, 87-120 (1989).
- 164 7. A. R. Lohe, P. A. Roberts, An unusual Y chromosome of *Drosophila simulans* carrying  
165 amplified rDNA spacer without rRNA genes. *Genetics* **125**, 399-406 (1990).
- 166 8. F. M. Ritossa, K. C. Atwood, S. Spiegelman, A molecular explanation of the bobbed  
167 mutants of *Drosophila* as partial deficiencies of "ribosomal" DNA. *Genetics* **54**, 819-834  
168 (1966).
- 169 9. K. D. Tartof, Unequal mitotic sister chromatin exchange as the mechanism of ribosomal  
170 RNA gene magnification. *Proc Natl Acad Sci U S A* **71**, 1272-1276 (1974).

- 171 10. T. Kobayashi, Ribosomal RNA gene repeats, their stability and cellular senescence. *Proc*  
172 *Jpn Acad Ser B Phys Biol Sci* **90**, 119-129 (2014).  
173 11. K. L. Lu, J. O. Nelson, G. J. Watase, N. Warsinger-Pepe, Y. M. Yamashita,  
174 Transgenerational dynamics of rDNA copy number in *Drosophila* male germline stem  
175 cells. *Elife* **7**, (2018).  
176

177 **Figures**

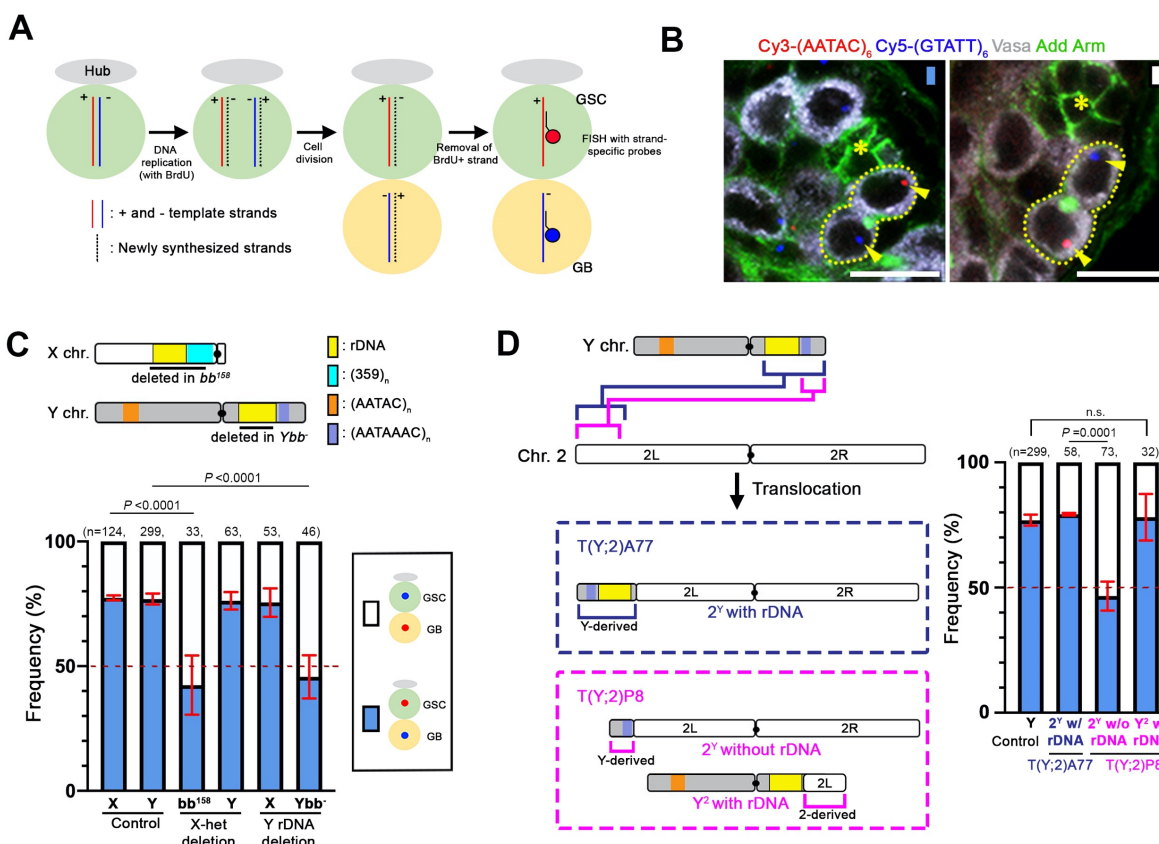

178

179 **Fig. 1. rDNA loci are required for NRSS of the X and Y chromosomes in *D. melanogaster***

180 (A) Chromosome-orientation *in situ* hybridization (CO-FISH) to assess NRSS. Plus (+) vs.

181 minus (-) templated strands are indicated by red and blue lines, newly-synthesized strands

182 by black dotted lines. Following removal of BrdU-containing, newly-synthesized strands,

183 strand-specific probes were applied to distinguish red vs. blue templated strands.

184 (B) Representative images of Y chromosome CO-FISH results where a GSC inherits the ‘red’

185 strand ((AATAC)<sub>n</sub>), whereas a GB inherits the ‘blue’ strand ((GTATT)<sub>n</sub>). The hub, the

186 stem cell niche to which GSCs are attached, is indicated by an asterisk, GSC-GB pairs

187 are outlined by dotted lines and the CO-FISH signals by arrowheads. Vasa: germ cells.

188 Arm: hub. Add: the connection between GSC and GB. Bar: 10μm.

189 (C, D) Schematics of *D. melanogaster* X and Y chromosomes (C) and Y-2 translocation

190 chromosomes (D). Summary of sister chromatid segregation patterns in indicated genotypes

191 is shown (see [table S1 and S2](#)). Data shown as mean ± s.d. from three independent

192 experiments. n, number of GSC-GB pairs scored. *P*-values: Fisher’s exact test.

193



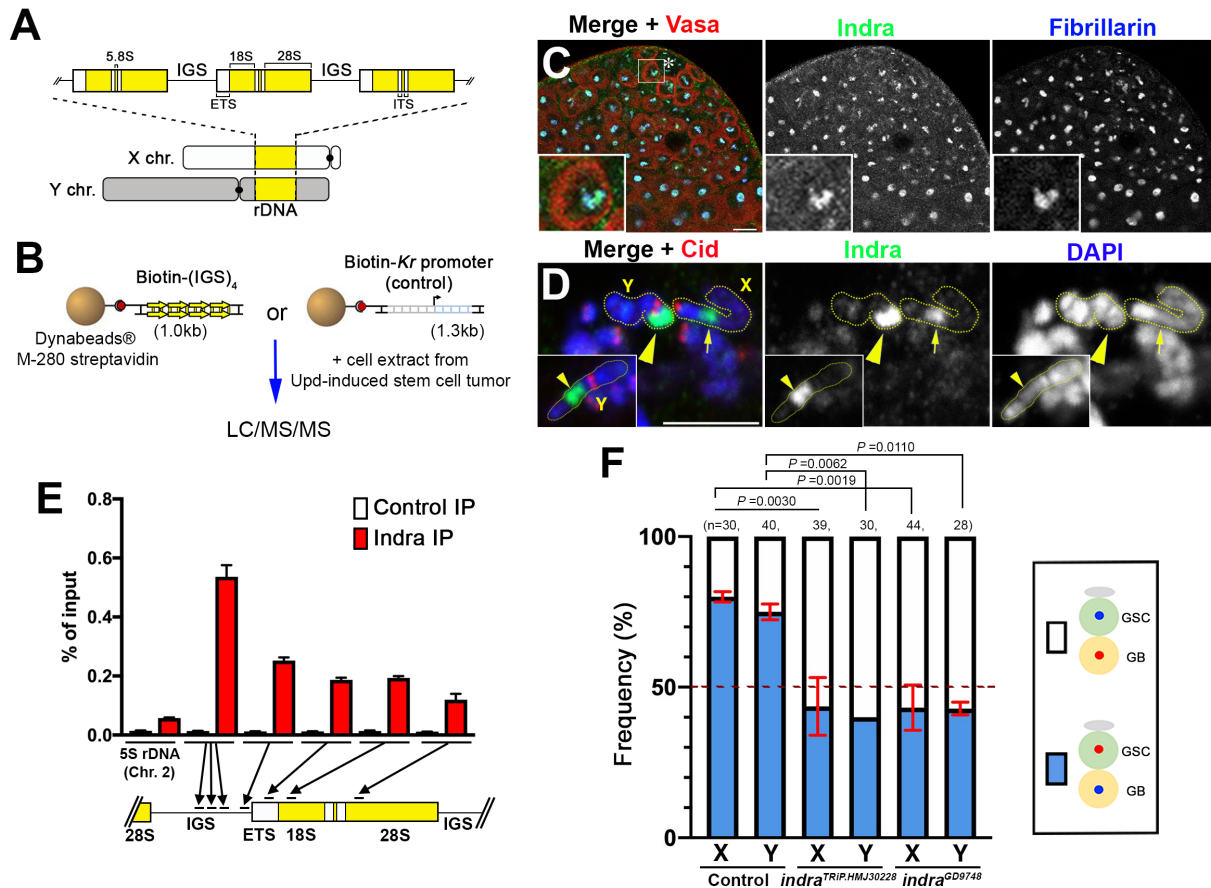

194

195 **Fig. 2. Indra is a novel zinc-finger protein that binds to rDNA and mediates NRSS.**

196 (A) Schematic of rDNA loci in *D. melanogaster*.

197 (B) Experimental scheme to isolate IGS-binding proteins (see [Materials and Methods](#)).

198 (C) Localization of Indra at the apical tip of the testis. The hub is indicated by an asterisk. An  
199 enlarged image of a GSC is shown in the inset. Fibrillarin: nucleolus. Vasa: germ cells.  
200 Bar: 10µm.

201 (D) Localization of Indra on a metaphase chromosome spread from germ cells. The X rDNA  
202 locus (arrow) and Y rDNA locus (arrowhead) can be identified by their relative location  
203 to the centromere (Cid). An additional example of the Y chromosome is shown in the  
204 inset. Bar: 5 µm.

205 (E) Indra ChIP-qPCR showing enrichment of Indra on rDNA/IGS. The 5S rDNA sequence  
206 on chromosome 2 outside of the rDNA loci was used as a negative control. Mean and s.d.  
207 from three technical replicates of qPCR are shown. Similar results were obtained from  
208 two biological replicates.

209 (F) Summary of sister chromatid segregation patterns upon knockdown of *indra* (see [table](#)  
210 [S4](#)). Data shown as mean  $\pm$  s.d. from three independent experiments. n, number of GSC-  
211 GB pairs scored. *P*-values: Fisher's exact test.  
212

213

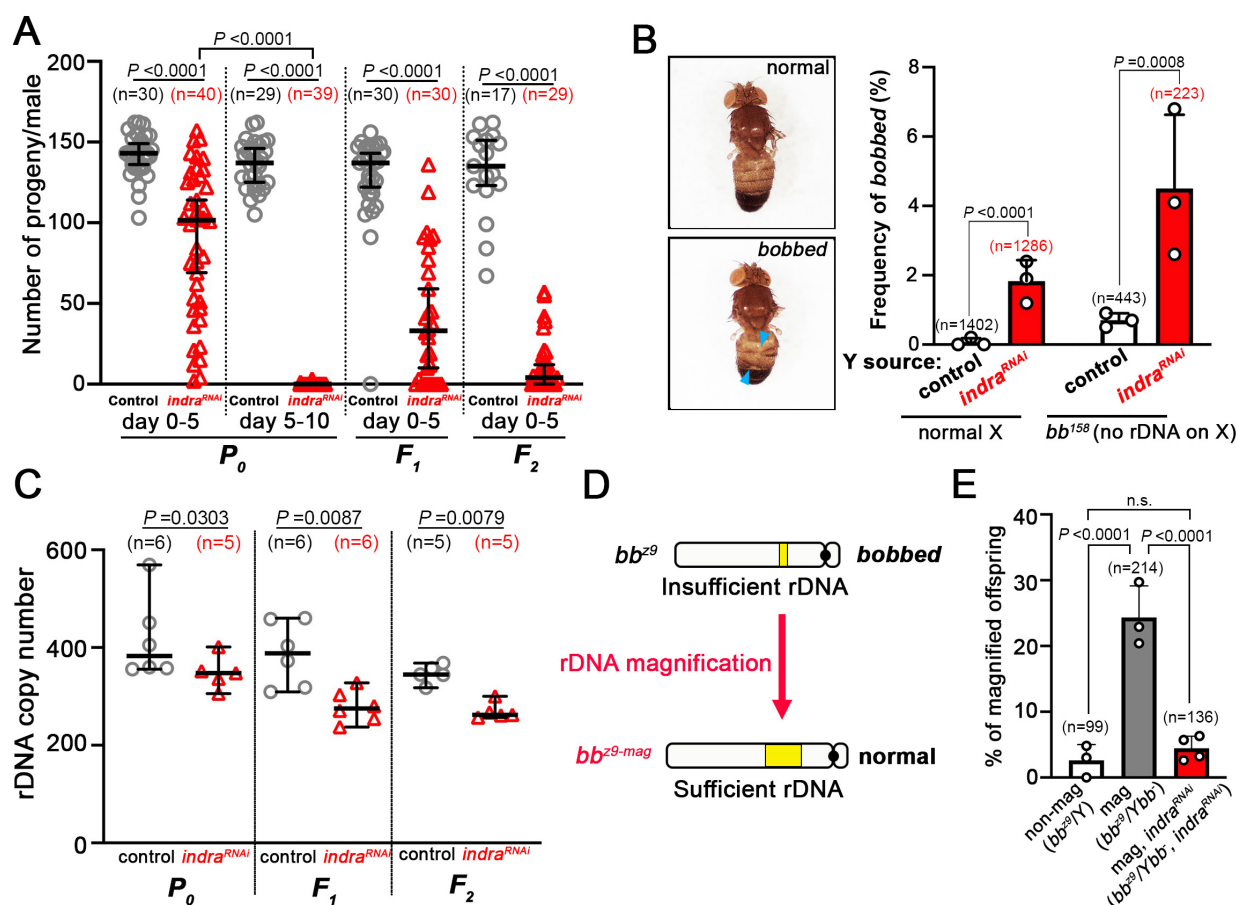

214

215 **Fig. 3. *indra* is required for rDNA copy number maintenance**

216 (A) Fertility of control and *nos-gal4>UAS-indra*<sup>TRiP.HMJ30228</sup> males across generations ( $P_0$ - $F_2$ ).

217 Total number of progeny from 0-5 day old males in each generation and 5-10 day old  
 218 males in  $P_0$  were scored. Data shown as median with 95% confidence interval and  
 219 individual data points. n, number of individual crosses scored.  $P$ -value: two-tailed Mann-  
 220 Whitney test.

221 (B) Frequency of *bobbed* animals in progeny of 0-5 day-old control and *nos-gal4>UAS-*  
 222 *indra*<sup>TRiP.HMJ30228</sup> males. Mean and s.d. from three independent experiments with  
 223 individual data points are shown. n, total number of progeny scored.  $P$ -values: two-tailed

224 chi-squared test. Examples of normal and ‘bobbed’ cuticle phenotypes are shown on the  
 225 left.

226 (C) 28S rRNA gene copy number in the testes from 0-5 day old control and *nos-gal4>UAS-*  
 227 *indra*<sup>TRiP.HMJ30228</sup> males in successive generations ( $P_0$ - $F_2$ ) assessed by ddPCR. Data shown

228 as median with 95% confidence interval and individual data points. n, number of  
229 individual crosses scored. *P*-value: two-tailed Mann-Whitney test.

230 (D) Schematic diagram of rDNA magnification assay (see [fig. S4](#) for the details).  
231 Magnification was detected by normal cuticle phenotype in the offspring.

232 (E) Frequency of rDNA magnification in the indicated genotypes/conditions. Data shown as  
233 mean and s.d. from four (*nos-gal4>UAS-indra<sup>GD9748</sup>*, *UAS-Dcr-2*) or three (the rest)  
234 independent experiments with individual data points. n, total number of progeny scored.  
235 *P*-values: Fisher's exact test.  
236

237

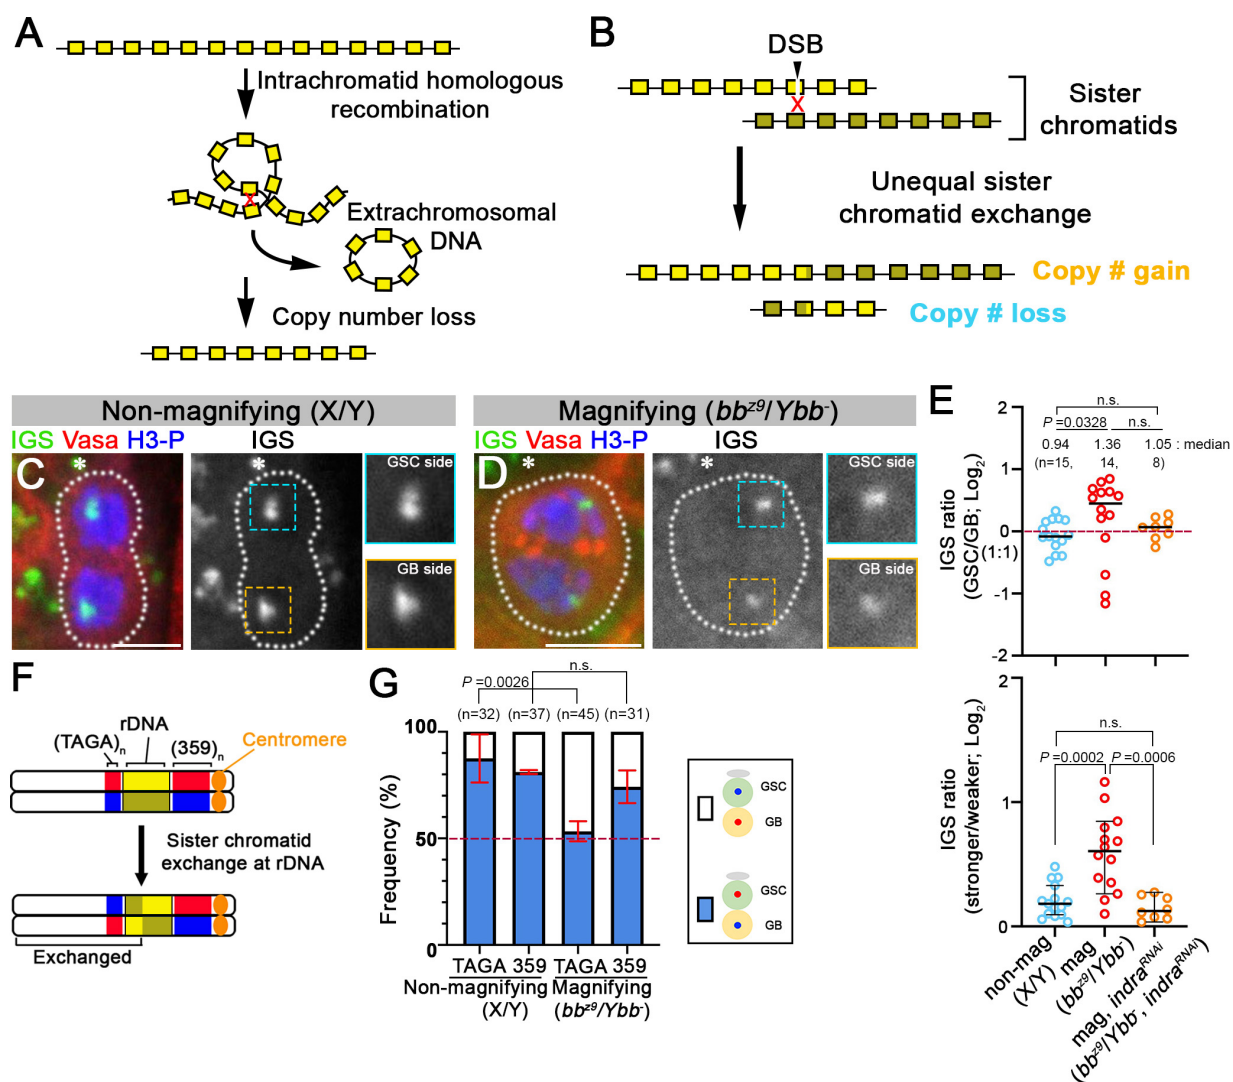

238

239 **Fig. 4. rDNA loci undergo sister chromatid exchange and segregate asymmetrically in**

240 **GSCs during rDNA magnification**

241 (A) Diagram of spontaneous rDNA copy number loss by intrachromatid recombination.

242 (B) A proposed model for rDNA copy number recovery by unequal sister chromatid  
243 exchange.

244 (C, D) DNA-FISH for IGS during anaphase in GSCs under normal (*yw*) (C) and magnifying  
245 (*bb<sup>z9</sup>/Ybb<sup>-</sup>*) (D) conditions. The hub is indicated by an asterisk. An enlarged image of the  
246 IGS signal from GSC and GB sides is shown in the inset. Bar: 5  $\mu$ m.

247 (E) Quantification of IGS signal intensity presented as GSC side/GB side (top panel) or

248 stronger/weaker (bottom panel) during anaphase in GSCs in control and *nos-gal4>UAS-*

249 *indra*<sup>GD9748</sup>, *UAS-Dcr-2* males. The median and individual data point are shown. 95%  
250 confidence interval is also shown in the bottom panel. n, number of anaphase cells  
251 scored. *P*-value: two-tailed Mann-Whitney test. Note that due to rare cases where the GB  
252 side exhibited stronger IGS signal than GSC side, the data did not reach statistical  
253 significance between control and *indra*<sup>GD9748</sup> under magnifying conditions in the top  
254 panel.

255 (F) Diagram of the X chromosome showing the location of the rDNA and the 359-bp and  
256 (TAGA)<sub>n</sub> repeats. Sister chromatid exchange at rDNA loci would flip (TAGA)<sub>n</sub>  
257 segregation pattern relative to 359-bp.

258 (G) Summary of sister chromatid segregation patterns assessed by 359-bp and (TAGA)<sub>n</sub>  
259 probes in the indicated genotypes/conditions (see [table S5](#)). Data shown as mean ± s.d.  
260 from three independent experiments. n, number of GSC-GB pairs scored. *P*-values:  
261 Fisher's exact test.

## 1 **Supplementary Materials**

2 Materials and Methods

3 Supplementary Text

4 Figs. S1 to S5

5 Tables S1 to S7

6 References (1-18)

7

## 8 **Materials and method**

### 9 Fly husbandry and strains

10 All fly stocks were raised on standard Bloomington medium at 25°C containing 0.15% of tegosept  
11 as anti-fungal (no propionic acid was added). The following fly stocks were used: *Df(1)bb<sup>158</sup>*,  
12 *y<sup>l</sup>/Dp(1;Y)y<sup>+</sup>/C(1)\**; *ca<sup>l</sup> awd<sup>K</sup>* (BDSC3143), *FM6/C(1)DX*, *y\* f<sup>l</sup>/Y* (BDSC784), *UAS-*  
13 *indra<sup>TRiP.HMJ30228</sup>* (BDSC63661), *UAS-Dcr-2* (BDSC24650), *indra-GFP* (BDSC67660;  
14 <http://flybase.org/reports/FBti0186577>) were obtained from the Bloomington Drosophila Stock  
15 Center. *y<sup>l</sup> eq<sup>l</sup>/Df(YS)bb<sup>-</sup>* (DGRC101260), *T(Y;2)A77*, *B<sup>S</sup>*, *y<sup>+</sup>/SM1*; *C(1)RM*, *y<sup>l</sup>/C(1;Y)I*, *y<sup>l</sup>*  
16 (DGRC130079), *T(Y;2)P8*, *B<sup>S</sup>*, *y<sup>+</sup>/SM1*; *C(1)RM*, *y<sup>l</sup>/C(1;Y)I*, *y<sup>l</sup>* (DGRC130170) were obtained  
17 from the Kyoto Stock Center. *D. simulans W<sup>501</sup>*(DSSC14021-0251.195) was obtained from the  
18 National Drosophila Species Stock Center. *UAS-indra<sup>GD9748</sup>* (v20839) was obtained from the  
19 Vienna Drosophila Resource Center. *nos-gal4 (1)*, *UAS-Upd (2)*, *tub-gal80<sup>S</sup> (3)*, *nos-gal4* without  
20 VP16 (4) have been previously described.

21

22 To examine the sister chromatid segregation patterns of the 2<sup>Y</sup> and Y<sup>2</sup> chromosomes,  
23 *T(Y;2)A77/SM1*; *C(1)RM/O* or *T(Y;2)P8/SM1*; *C(1)RM/O* females were crossed to *yw* males and  
24 the resulting *T(Y;2)A77/+; X/O* and *T(Y;2)P8/+; X/O* male flies were examined. The details of the  
25 translocation are shown in [Fig. 1D](#).

26

27 Two independent RNAi lines, *UAS-indra<sup>TRiP.HMJ30228</sup>* and *UAS-indra<sup>GD9748</sup>*, were used to  
28 knockdown *indra* specifically in early germ cells using *nos-gal4* as the driver. *UAS-indra<sup>GD9748</sup>*  
29 was combined with *UAS-Dcr-2* to increase RNAi efficiency. The knockdown efficiency of these  
30 RNAi lines was validated by immunostaining using an anti-Indra antibody ([fig. S2A](#)). Since *nos-*  
31 *gal4>UAS-indra<sup>TRiP.HMJ30228</sup>* results in severe germ cell loss due to high RNAi efficiency ([Fig. 3A](#),

32 [fig. S2A](#)), a temperature-sensitive GAL4 inhibition system (*tub-gal80<sup>ts</sup>*; *nos-gal4ΔVPI6>UAS-*  
33 *indra<sup>TRiP.HMJ30228</sup>*) was used as necessary (e.g. [Fig. 2F](#)). Upon shifting from the permissive  
34 temperature (18°C) to the non-permissive temperature (29°C), GSCs were lost gradually over 2-4  
35 days ([fig. S2, B and C](#)), and the CO-FISH assay ([Fig. 2F](#)) was conducted 3 days after temperature  
36 shift. In assays that required a sustained germline (e.g. magnification assays, [Fig. 3E](#) and [Fig. 4E](#)),  
37 we used *nos-gal4>UAS-indra<sup>GD9748</sup>*, *UAS-Dcr-2*.

38

### 39 Immunofluorescence staining and confocal microscopy

40 *Drosophila* adult testes were dissected in phosphate-buffered saline (PBS), transferred to 4%  
41 formaldehyde in PBS and fixed for 30 min. The testes were then washed in PBST (PBS containing  
42 0.1% Triton X-100) for at least 30 min, followed by incubation with primary antibody in 3%  
43 bovine serum albumin (BSA) in PBST at 4°C overnight. Samples were washed for 60 min (3 x 20  
44 min washes) in PBST, incubated with secondary antibody in 3% BSA in PBST at 4°C overnight,  
45 washed as above, and mounted in VECTASHIELD with 4',6-diamidino-2-phenylindole (DAPI;  
46 Vector Labs, Burlingame, CA). To examine Indra localization on mitotic chromosome spreads,  
47 *Drosophila* 3rd instar larval testes were dissected in PBS, transferred to 0.5% sodium citrate and  
48 incubated for 10 min, fixed in 4% formaldehyde in PBS for 4 min, then squashed between the  
49 cover slip and slide glass. The sample was frozen in liquid nitrogen, the cover slip was removed,  
50 and immediately washed in PBS, followed by immunofluorescence staining as described above,  
51 except that the incubation was performed on the slide glass in a humid chamber with the sample  
52 covered with a small piece of parafilm.

53

54 The primary antibodies used were as follows: rabbit anti-Vasa (1:200; d-26; Santa Cruz  
55 Biotechnology, Santa Cruz, CA), mouse anti-Adducin-like [1:20; 1B1; developed by H.D. Lipshitz,  
56 obtained from Developmental Studies Hybridoma Bank (DSHB)](5), mouse anti-Armadillo  
57 (1:100; N2 7A1; developed by E. Wieschaus, obtained from DSHB)(6), rat-anti Vasa (1:20;  
58 developed by A.C. Spradling and D. Williams, obtained from DSHB), mouse anti-Fibrillarin  
59 (1:200; 38F3; Abcam), chicken anti-Cid (1:500)(7). The anti-Indra antibody was generated by  
60 injecting a peptide (RKITDVLETITHRSIPSSLPIKIC) into guinea pig (Covance, Denver, PA) and  
61 used at a dilution of 1:500. Specificity of the antibody was validated by the lack of signal in  
62 *indra<sup>RNAi</sup>* testis ([fig. S2A](#)). Alexa Fluor-conjugated secondary antibodies (Life Technologies) were



63 used at a dilution of 1:200. Images were taken on a Leica TCS SP8 confocal microscope with a  
64 63x oil immersion objective (NA = 1.4) and processed using Adobe Photoshop software.

65  
66 For DNA FISH combined with immunofluorescent staining, whole mount *Drosophila* testes were  
67 prepared as described above, and the immunofluorescence staining protocol was carried out first.  
68 Upon completion of the wash post incubation with the secondary antibody, samples were fixed  
69 with 4% formaldehyde for 10 min and washed in PBST for 30 min. Fixed samples were incubated  
70 with 2 mg/ml RNase A solution at 37°C for 10 min, then washed with PBST. Samples were washed  
71 in 2x SSC with increasing formamide concentrations (20% and 50%) for 10 min each.  
72 Hybridization buffer (50% formamide, 10% dextran sulfate, 2x SSC, 1 mM EDTA, 1 mM probe)  
73 was added to washed samples. Samples were denatured at 91°C for 2 min, then incubated overnight  
74 at 37°C. Following the hybridization, testes were washed once in 50% formamide/2x SSC, once  
75 in 20% formamide/2x SSC, and 3 times in 2x SSC. All reagents contained 1 mM EDTA except  
76 for the washes prior to RNase A treatment. Fluorescence quantification was done on merged z-  
77 stacks using Image J ‘Sum of pixel intensity (RawIntDen)’ to compare signal intensity between  
78 sister chromatids. To avoid the effect of signal intensity changes along the Z plane, we scored  
79 anaphase GSCs only when two IGS FISH signals were found within the same Z plane for [Fig. 4,](#)  
80 [C-E.](#)

### 81 82 Chromosome orientation fluorescence *in situ* hybridization (CO-FISH)

83 CO-FISH in whole mount *Drosophila* testes was performed as previously described (8). Briefly,  
84 young adult flies (day 1-3) were fed with 5-bromodeoxyuridine (BrdU)-containing food (950 µl  
85 of 100% apple juice, 7 mg of agar, and 50 µl of 100 mg/ml BrdU solution in a 1:1 mixture of  
86 acetone and DMSO) for 12 hours. After the feeding period, flies were transferred to regular fly  
87 food for 13.5 hours. Because the average GSC cell cycle length is ~12 hour, most GSCs undergo  
88 a single S phase in the presence of BrdU followed by mitosis during this feeding procedure. GSCs  
89 that have undergone more or less than one S phase or mitosis were excluded from our analysis by  
90 limiting the scoring to GSC-GB pairs that have complementary CO-FISH signals in the GSC and  
91 GB (red signal in one cell, blue signal in the other). Note that GSC and GB stay connected by the  
92 fusome until mid-S phase, which allowed identification of the GSC-GB sister pairs. Testes were  
93 dissected, fixed and immunostained as described above. Then, testes were fixed for 10 min with  
94 4% formaldehyde in PBS, followed by 3 washes with PBST. Following the washes, the testes were

95 rinsed once with PBST and treated with RNase A (Roche; 2 mg/ml in PBS) for 10 min at 37°C,  
96 washed with PBST for 5 min, and stained with 100 µl of 2 µg/ml Hoechst 33258 (Invitrogen) in  
97 2x SSC for 15 min at room temperature. The testes were then rinsed 3 times with 2x SSC,  
98 transferred to a tray, and irradiated with ultraviolet light in a CL-1000 Ultraviolet Crosslinker  
99 (UVP; wavelength: 365 nm; calculated dose: 5400 J/m<sup>2</sup>). Nicked BrdU positive strands were  
100 digested with exonuclease III (New England BioLabs) at 3 U/µl in 1x NEB1 buffer or 1x NEB  
101 cutsmart buffer for 10 min at 37°C. The testes were washed once with PBST for 5 min and then  
102 fixed with 4% formaldehyde in PBS for 2 min. Subsequently, the fixed testes were washed 3 times  
103 with PBST. Testes were incubated sequentially for a minimum of 10 min each in 20%  
104 formamide/2x SSC and 50% formamide/2x SSC. The testes were incubated with hybridization  
105 buffer (50% formamide, 2x SSC, 10% dextran sulfate) containing 1 µM of each probe for 16 hours  
106 at 37°C. Following hybridization, testes were washed once in 50% formamide/2x SSC, once in  
107 20% formamide/2x SSC and 3 times in 2x SSC. Images were taken on either a Leica TCS SP5 or  
108 STELLARIS 8 confocal microscope with a 63x oil immersion objective (NA = 1.4) and processed  
109 using Adobe Photoshop software. For CO-FISH in GSCs from *tub-gal80<sup>ts</sup>; nos>indra<sup>TRiP.HMJ30228</sup>*,  
110 the BrdU pulse was conducted 3 days after temperature shift (fig. S2C). BrdU was fed at 29°C for  
111 9 hours, followed by an 11-hour chase at 29°C in which the flies were fed regular fly food. The  
112 probes are described in table S6. All reagents contained 1 mM EDTA except for the washes  
113 immediately preceding an enzymatic reaction (RNase A and exonuclease III).

114

#### 115 IGS DNA pull down and mass-spectrometry

116 200 pairs of *upd*-expressing testes (*nos-gal4>UAS-upd*) were dissected in Schneider's *Drosophila*  
117 Medium (Gibco) and washed 3 times with ice-cold PBS. *upd* expression causes overproliferation  
118 of GSC-like cells. The testes were homogenized in lysis buffer [20 mM Tris-HCl pH8.0, 1 mM  
119 EDTA, 10% Glycerol, 0.2% NP-40, 1 mM DTT, 1x solution of PhoSTOP cocktail (Roche), 1x  
120 solution of c0mplete EDTA-free protease inhibitor cocktail (Roche)], and the homogenate was  
121 incubated on ice for 20 min. Following this incubation, the lysate was centrifuged at 3,000 rpm for  
122 10 min at 4°C, and the supernatant was saved as whole cell extract. The pellet, which contains the  
123 nuclear fraction, was resuspended in lysis buffer containing 100 mM NaCl and incubated on ice  
124 for 1 hour. During incubation, the sample was vortexed at highest setting for 15 sec every 10 min.  
125 The nuclear fraction was isolated by centrifugation at 14,000 rpm for 30 min at 4°C and mixed

126 with the whole cell extract prepared above. Protein concentration was measured by absorbance at  
127 562 nm using Pierce™ BCA Protein Assay Kit (Thermo Scientific) to adjust the concentration  
128 between samples.

129

130 The 240-bp IGS sequence (repeated 4 times, 4xIGS), or the *Kr* gene promoter sequence (control),  
131 was cloned into pBluescript SK-. Biotin end-labeling at the 5' of one strand of the 4xIGS or *Kr*  
132 gene promoter was performed by PCR using a T7 primer with Biotin-TEG and a T3 primer.  
133 Biotinylated 4xIGS and *Kr* gene promoter DNA were then purified by QIAGEN's PCR  
134 purification kit. 2 µg of each biotinylated DNA was immobilized to 100 µl of streptavidin-bound  
135 M-280 Dynabeads™ (invitrogen). The beads were washed 3 times with 1x Binding and Washing  
136 buffer (5 mM Tris-HCl pH8.0, 0.5 mM EDTA, 500 mM NaCl) and then blocked with 0.5% BSA  
137 in TGEDN buffer (120 mM Tris-HCl pH8.0, 1 mM EDTA, 100 mM NaCl, 1 mM DTT, 0.1%  
138 Triton X-100, 10% Glycerol). 20% volume of each of the biotinylated DNA-conjugated  
139 Dynabeads™ was incubated with 20 µg of herring sperm DNA (Sigma-Aldrich) and the cell  
140 extract prepared above (containing 500 µg of protein at 3.8-4.8 µg/µl concentration, matched  
141 between control vs. IGS beads). After incubating for 2 hours at 4°C, the beads were washed 5  
142 times with TGEDN buffer. The proteins bound to either the 4xIGS or *Kr* gene promoter DNA were  
143 eluted in LDS sample loading buffer (1.5x) at 100°C for 15 min. 50% volume of each DNA bound  
144 proteins was separated on a 10% Bis-Tris Novex mini-gel (invitrogen) using the MES buffer  
145 system. The gel was stained with coomassie and excised into ten equally sized segments. These  
146 segments were analyzed by LC/MS/MS (MS Bioworks, Ann Arbor, MI). The gel digests were  
147 analyzed by nano LC/MS/MS with a Waters NanoAcquity HPLC system interfaced to a Thermo  
148 Fisher Q Exactive. Peptides were loaded on a trapping column and eluted over a 75 µm analytical  
149 column at 350 nL/min; both columns were packed with Luna C18 resin (phenomenex). The mass  
150 spectrometer was operated in data-dependent mode, with MS and MS/MS performed in the  
151 Orbitrap at 70,000 FWHM resolution and 17,500 FWHM resolution, respectively. The fifteen most  
152 abundant ions were selected for MS/MS.

153

#### 154 ChIP-qPCR

155 200 pairs of *upd*-expressing testes (*nos-gal4>UAS-upd*) were dissected in ice-cold PBS containing  
156 protease inhibitor [1x solution of complete protease inhibitor cocktail (Roche) and 1 mM PMSF].

157 The testes were crosslinked by incubating with 1% formaldehyde for 15 min at 37°C and rinsed  
158 twice in ice-cold PBS containing protease inhibitor to stop the crosslink reaction. The testes were  
159 homogenized in 200 µl of ice-cold ChIP Sonication Buffer [1% triton X-100, 0.1% sodium  
160 deoxycholate, 50 mM Tris-HCl (pH 8.0), 150 mM NaCl, 5 mM EDTA], and the homogenate was  
161 incubated on ice for 15 min. Following the incubation, the homogenate was aliquoted into 0.5 ml  
162 PCR tubes, placed in a Biorupter® Plus sonication system (DIAGENODE) and sonicated in 4°C  
163 water bath for 10 cycles of 30 sec ‘ON’ and 30 sec ‘OFF’ at ‘HIGH’ setting. The sonicated lysate  
164 was centrifuged at 14,000 rpm for 10 min at 4°C to pellet cell debris. The volume of supernatant  
165 was brought up to 1 ml with ChIP sonication buffer, and 40 µl of Dynabeads™ Protein A  
166 (invitrogen) was added to the supernatant. After a 1-hour preabsorption with Dynabeads™ Protein  
167 A at 4°C, 30 µl of supernatant (3%) was kept as ‘input’. The rest was split into two and incubated  
168 overnight with 10 µl of anti-Indra antibody (1:10 dilution from the original serum; generated as  
169 described above) or 10 µl of pre-immune guinea pig serum (1:10 dilution from the original serum),  
170 respectively. After incubating for 16 hours, 40 µl Dynabeads™ Protein A was added to each  
171 reaction and incubated for an additional 4 hours at 4°C with rotation. The beads were then washed  
172 for 5 min at 4°C with 1 ml of the following buffers: 2 washes with ChIP sonication buffer, followed  
173 by 3 washes with High Salt Wash buffer [1% triton X-100, 0.1% sodium deoxycholate, 50 mM  
174 Tris-HCl (pH 8.0), 500 mM NaCl, 5 mM EDTA]; 2 washes with LiCl Immune Complex Wash  
175 buffer [250 mM LiCl, 0.5% NP-40, 0.5% deoxycholate, 1 mM EDTA, 10 mM Tris-HCl (pH8.0)];  
176 1 wash with TE buffer [10 mM Tris-HCl (pH8.0), 1 mM EDTA). For elution, each ChIP sample  
177 was incubated with 250 µl of Elution Buffer (1% SDS, 100 mM NaHCO<sub>3</sub>) for 30 min at 65°C,  
178 vortexing gently every 10 min. After repeating the elution process once more, the supernatants  
179 were combined. 500 µl of elution buffer was added to the ‘input’ sample. 20 µl of 5 M NaCl and  
180 10 µl of RNase A [Roche; 2 mg/ml in 10 mM Tris-HCl (pH7.5) and 15 mM NaCl] were added to  
181 each sample and incubated for overnight at 65°C. After incubating for 16 hours, 2 µl of Proteinase  
182 K (New England BioLabs), 10 µl of 500 mM EDTA, and 20 µl of 1 M Tris-HCl (pH8.0) were  
183 added to each sample and incubated at 45°C for 2 hours. The precipitated DNA was purified using  
184 QIAGEN’s PCR purification kit. Real-Time PCR was conducted to quantify precipitated DNA  
185 using the Standard Curve method. Power SYBR Green PCR Master Mix (appliedbiosystems) was  
186 used as the PCR reaction buffer. The QuantStudio™ 6 Flex System (appliedbiosystems) was used

187 for Real-Time PCR reaction and analyzing the data. Primers used for Real-Time PCR are listed in  
188 [table S7](#).

189

#### 190 Fertility assay

191 Newly eclosed single males (control (*nos-gal4*) or *nos-gal4>UAS-indra*<sup>TRiP.HMJ30228</sup>) were  
192 individually crossed to three *yw* virgin females. After 5 days, each male was transferred to a new  
193 vial with three new virgin females. The number of adult flies that eclosed in each vial was scored.  
194 *nos-gal4>UAS-indra*<sup>TRiP.HMJ30228</sup> females are completely sterile. Therefore, to examine the fertility  
195 of *nos>indra*<sup>TRiP.HMJ30228</sup> across generations, newly eclosed *nos-gal4>UAS-indra*<sup>TRiP.HMJ30228</sup>  
196 males for each generation were crossed to *nos-gal4* females to deplete *indra* in germline in the  
197 subsequent generation. Then, newly eclosed single males (control (*nos-gal4*) or *nos-gal4>UAS-*  
198 *indra*<sup>TRiP.HMJ30228</sup>) at each generation were individually crossed to three *yw* virgin females and the  
199 number of adult flies that eclosed in each vial was scored.

200

#### 201 Droplet Digital PCR (ddPCR)

202 20 pairs of testes/sample were dissected from 0-3 day-old control (*nos-gal4*) or *nos-gal4>UAS-*  
203 *indra*<sup>TRiP.HMJ30228</sup> males. Genomic DNA isolation was performed as previously described (9).  
204 Briefly, the testes were homogenized in 200  $\mu$ l of buffer A (100 mM Tris-HCl pH8.0, 100 mM  
205 EDTA pH8.0, 100 mM NaCl, 0.5% SDS), and then an additional 200  $\mu$ l of buffer A were added  
206 to the homogenate. The homogenate was incubated at 65°C for 30 min. Then 800  $\mu$ l of LiCl/KAc  
207 (2.5:1 mixture of 6 M LiCl and 5 M KAc) was added to the homogenate, and the sample was left  
208 on ice for 15 min. Subsequently, the sample was centrifuged at 14,000 rpm for 15 min, and 1 ml  
209 of supernatant was transferred to a new tube. The supernatant was mixed with 600  $\mu$ l of  
210 isopropanol and centrifuged at 14,000 rpm for 15 min. The pellet (containing genomic DNA) was  
211 washed once in 1 ml of 70% ethanol, air dried for 30min and dissolved in 35  $\mu$ l of TE buffer. The  
212 quality and concentration of genomic DNA were measured on a NANODROP ONE (Thermo  
213 Scientific).

214

215 30 ng of genomic DNA was used per 20  $\mu$ L ddPCR reaction for control gene reactions (RpL and  
216 Upf1), and 0.3 ng of genomic DNA was used per 20  $\mu$ L ddPCR reaction for 28S rRNA gene  
217 reactions. The primers and probes are listed in [table S7](#). ddPCR reactions were carried out

218 according to the manufacturer's protocol (Bio-Rad). In short, master mixes containing ddPCR  
219 Supermix for Probes (No dUTP) (Bio-Rad), genomic DNA, primer/probe mixes, and *HindIII*-HF  
220 restriction enzyme (New England Biolabs) for 28S rRNA gene reactions (no restriction enzyme is  
221 needed for the control gene reactions) were prepared in 0.2 mL PCR tubes, and incubated at room  
222 temperature for 15 min to allow for restriction enzyme digestion. ddPCR droplets were generated  
223 from samples using a QX200 Droplet Generator (Bio-Rad), and droplets then underwent complete  
224 PCR cycling on a C100 deep-well thermocycler (Bio-Rad). Droplet fluorescence was read using a  
225 QX200 Droplet Reader (Bio-Rad). Sample copy number was determined using Quantasoft  
226 software (Bio-Rad). rDNA copy number per genome was determined by 28S sample copy number  
227 multiplied by 100 (due to the 100x dilution of genomic DNA in the 28S reaction compared to  
228 control reaction) divided by control gene copy number multiplied by the expected number of  
229 control gene copies per genome (2 for RpL samples; 1 for Upf1 samples). The 28S rRNA gene  
230 copy number values normalized by each control were then averaged to determine 28S copy number  
231 for each sample.

232

### 233 Magnification assay

234 The experimental design to assay rDNA magnification is shown in [fig. S4](#). The  $bb^{z9}$  allele carries  
235 an insufficient rDNA copy number on the X chromosome (*10*), which exhibits a 'bobbed' cuticle  
236 phenotype when combined with the  $bb^{158}$  allele (no rDNA on X chromosome) in females. To  
237 induce magnification, the  $bb^{z9}$  allele was combined with a Y chromosome lacking rDNA  
238 ( $bb^{z9}/Ybb^-$ ) ('magnifying condition'). These  $bb^{z9}/Ybb^-$  males were crossed to  $bb^{158}/FM6$  females,  
239 and the resulting  $bb^{z9}/bb^{158}$  females were examined for the *bobbed* cuticle phenotype. If  
240 magnification occurred, a magnified allele ( $bb^{z9-mag}$ ) combined with  $bb^{158}$  would produce a wild  
241 type cuticle, whereas a non-magnified allele combined with  $bb^{158}$  would show a *bobbed* cuticle  
242 phenotype. The frequency of wild type cuticle among total female progeny without FM6 (i.e.  $bb^{z9}$   
243 and  $bb^{z9-mag} / bb^{158}$ ) was scored as 'magnification frequency'.

244

### 245 Statistical analysis

246 For comparison of sister chromatid segregation patterns in [Fig. 1, C and D](#), [Fig. 2F](#), [Fig. 4G](#), and  
247 [fig. S1](#), significance was determined by two-sided Fisher's exact tests. For comparison of  
248 frequencies of *bobbed* animals in [Fig. 3B](#) and wild-type cuticle animals in [Fig. 3E](#), significance

249 was determined by two-tailed chi-squared tests using a 2 x 2 contingency table (normal; *bobbed*).  
250 Other than these, significance was determined by two-tailed Mann-Whitney tests.

251

## 252 **Supplementary Text**

253 The results shown in Fig. 4 have a few critical implications. Under non-magnifying conditions,  
254 USCE appears to be rare, based on the equal amount of IGS FISH signal in anaphase GSCs (Fig.  
255 4, C and E) and based on the fact that both 359-bp repeats and (TAGA)<sub>n</sub> repeats segregate non-  
256 randomly (Fig. 4G). It is interesting to note that without asymmetry in rDNA copy number (under  
257 non-magnifying conditions), GSCs still faithfully retain a specific strand ('red strand') (Fig. 4, F  
258 and G). This suggests that NRSS is not mediated by actual copy number differences, but rather  
259 implies that sister chromatids (of rDNA loci) may have additional inherent asymmetries. We  
260 speculate that such asymmetries may correlate with the propensity of a specific sister chromatid  
261 to gain rDNA copy number, should USCE occur. An attractive candidate for such an asymmetry  
262 is the molecular asymmetry during DNA replication that is specific to rDNA loci. It is well  
263 established that DNA replication occurs unidirectionally in rDNA loci (11, 12) due to the presence  
264 of a replication fork block on one side of the replication origin (fig. S5A). Accordingly, one sister  
265 chromatid is mostly replicated as the leading strand, whereas the other is mostly replicated as the  
266 lagging strand. In yeast, the DNA break that induces rDNA copy number recovery is known to  
267 occur on the leading strand (the strand mostly replicated as the lagging strand) at the replication  
268 fork block (fig. S5B; (13)). If this is universal, the broken end of the leading strand has limited  
269 choices as to where to recombine with the sister chromatid to repair the DNA break. The broken  
270 end would not recombine with a region that is not yet replicated. The recently replicated region of  
271 the lagging strand, where Okazaki fragments have not been processed, may not be a good substrate  
272 for sister chromatid recombination, either. The remaining possible region would be the sister  
273 chromatid that was replicated as the leading strand (fig. S5B). If this happens, the strand mostly  
274 replicated as the lagging strand is likely to gain the copy number. Thus, we speculate that the  
275 mechanism that mediates NRSS may have the ability to distinguish leading vs. lagging strands and  
276 specifically connects the lagging strand to the GSC side.

277

278 Although the mechanism that ensures the retention of a specific strand to the GSC remains elusive,  
279 the CO-FISH results shown in Fig. 4, F and G provide a critical hint. Under magnifying conditions,

280 where USCE occurs, it is the (TAGA)<sub>n</sub> repeats whose segregation pattern is randomized. This  
281 suggests that the 359-bp side of the rDNA is responsible for the retention in GSCs. This side of  
282 the chromosome contains the centromere, whose asymmetry has been suggested to mediate non-  
283 random segregation of chromosomes (*14, 15*). However, we have no evidence thus far to suggest  
284 that the centromere is responsible for NRSS of the X and Y chromosomes. Additionally, the loss  
285 of rDNA with retention of most of 359-bp and the entire centromere was sufficient to compromise  
286 NRSS (Fig. 1C). Therefore, it is highly unlikely that 359-bp or the centromere contains sufficient  
287 information to mediate NRSS. Future investigation is required to address these key molecular  
288 mechanisms.  
289



290

A

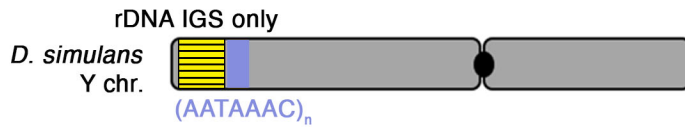

B

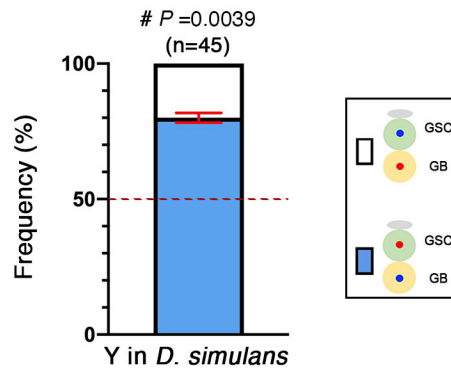

291

292 **Fig. S1. The *D. simulans* Y chromosome segregates sister chromatids non-randomly**

293 (A) Schematic of the *D. simulans* Y chromosome

294 (B) Summary of the sister chromatid segregation pattern assessed by CO-FISH in the *D.*  
295 *simulans* control strain ( $w^{501}$ ) (see [table S1](#) for detailed data). Data shown as mean  $\pm$  s.d.  
296 from three independent experiments. n, number of GSC-GB pairs scored. #, *P*-value of  
297 Fisher's exact test by comparing to hypothetical random sister chromatid segregation is  
298 shown.  
299

300

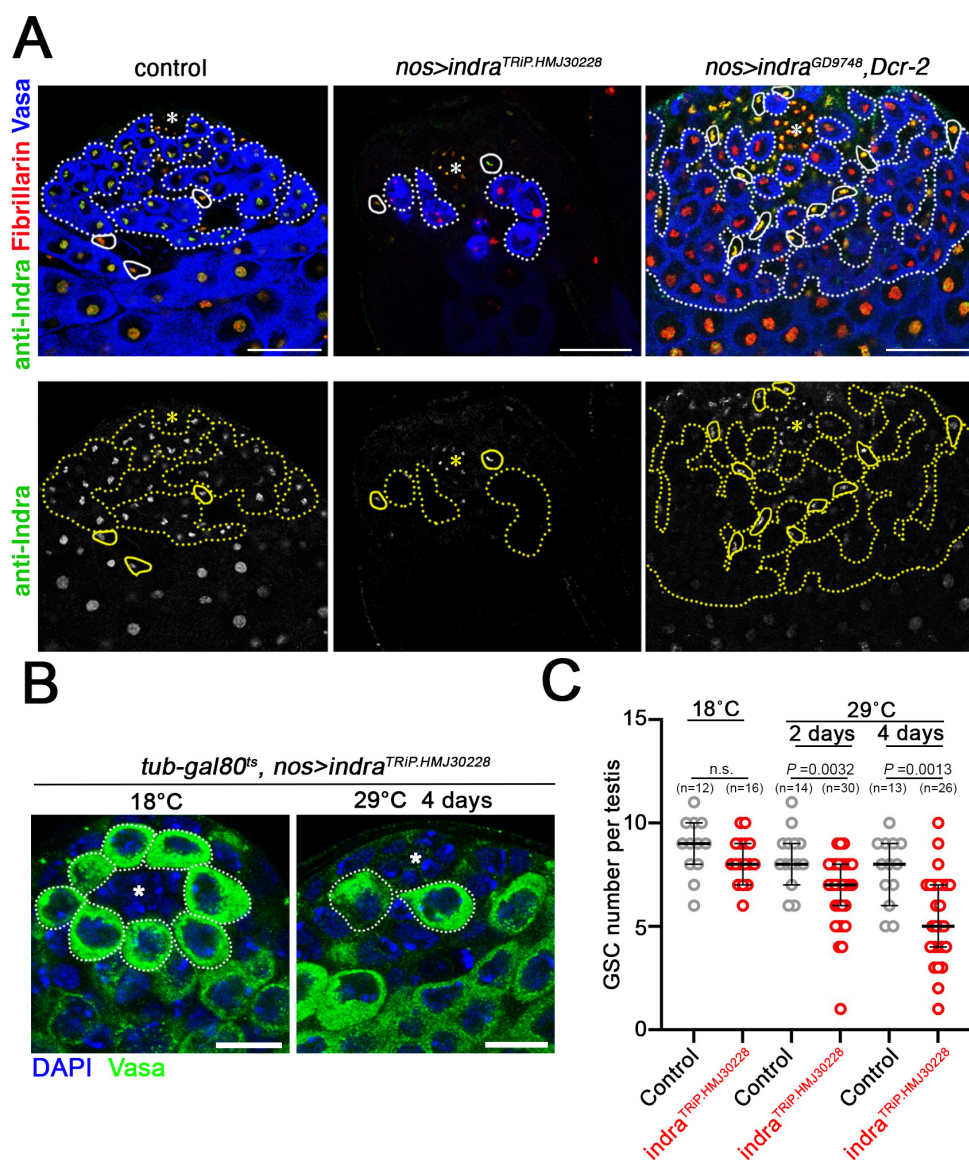

301

302 **Fig. S2. Validation of *indra*<sup>RNAi</sup> efficiency and antibody specificity**

303 (A) Examples of testis apical tips after *indra* knockdown by indicated *indra*<sup>RNAi</sup> lines. Anti-  
 304 Indra antibody staining was lost from germ cells upon *indra* knockdown by *nos-*  
 305 *gal4>indra<sup>TRIP.HMJ30228</sup>* or *nos-gal4>indra<sup>GD9748</sup> dcr-2*. (UAS-dcr-2 was added to enhance  
 306 the efficiency of *indra<sup>GD9748</sup>*). This experiment also demonstrates the specificity of the  
 307 anti-Indra antibody. The hub is indicated by an asterisk. Germ cells are indicated by  
 308 dotted lines and somatic cells are indicated by solid lines. Bar: 25  $\mu$ m.

309 (B) Examples of testis apical tips before and after induction of *nos-gal4>indra<sup>TRIP.HMJ30228</sup>*.  
 310 GSCs are indicated by dotted lines and the hub is indicated by an asterisk. Bar: 10  $\mu$ m.

311 (C) GSC number after induction of *indra<sup>TRIP.HMJ30228</sup>*. n, number of testes scored. P-values:  
 312 two-tailed Mann-Whitney test.

313

314

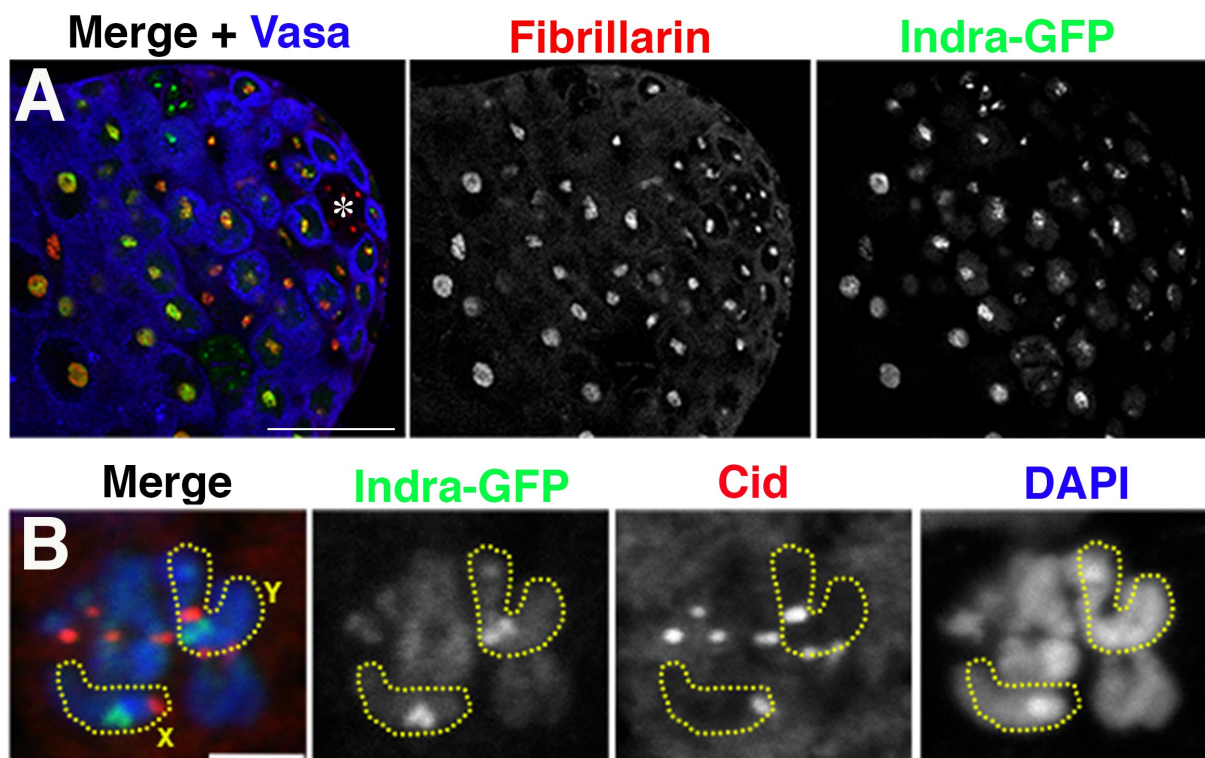

315

316

**Fig. S3. Localization of Indra-GFP to the nucleolus and rDNA loci**

317

(A) Localization of Indra-GFP at the apical tip of the testis. Indra localizes to nucleolus visualized by Fibrillarin. The hub is indicated by an asterisk. Bar: 25  $\mu$ m.

318

319

(B) Localization of Indra-GFP on a metaphase chromosome spread. The X and Y chromosomes are indicated by dotted lines. Cid: centromere. Bar: 5  $\mu$ m.

320

321

322

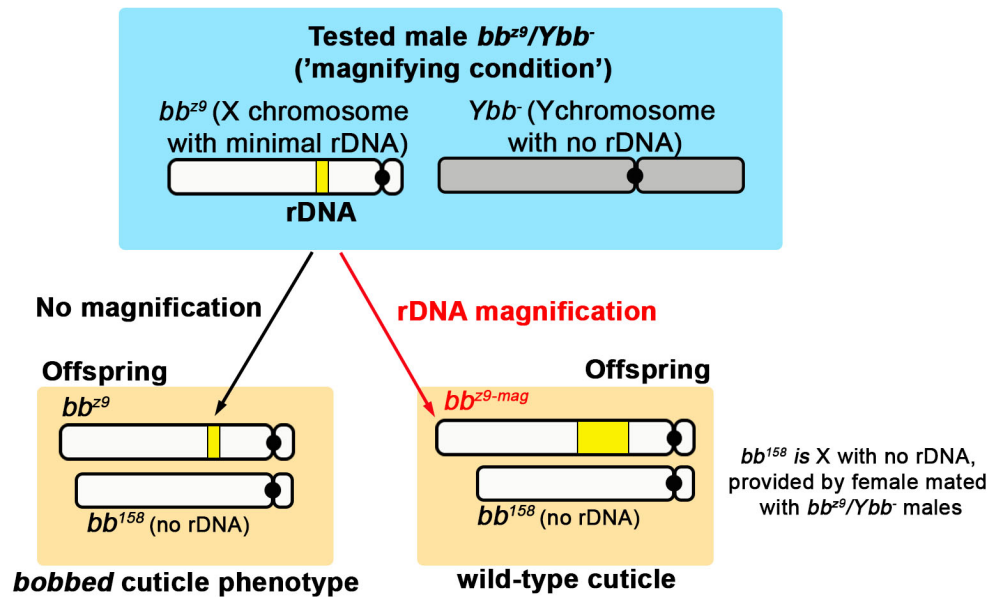

323

324

**Fig. S4. Diagram of phenotypic assessment to detect rDNA magnification of the  $bb^{z9}$  allele**

325

326

327

328

329

330

331

332

333

334

335

The  $bb^{z9}$  allele carries an insufficient rDNA copy number on the X chromosome, which causes flies to exhibit a ‘bobbed’ cuticle phenotype when combined with the  $bb^{158}$  allele (no rDNA on X chromosome) in females (Fig. 3B). To induce magnification, the  $bb^{z9}$  allele was combined with a Y chromosome without rDNA ( $bb^{z9}/Ybb^-$ ) (‘magnifying condition’). To assess whether the  $bb^{z9}$  allele magnified, these  $bb^{z9}/Ybb^-$  males were crossed to  $bb^{158}/FM6$  female, and cuticle phenotype of the resulting  $bb^{z9}/bb^{158}$  females was examined. If magnification occurred, the magnified allele ( $bb^{z9-mag}$ ) combined with  $bb^{158}$  would have a wild type cuticle, whereas the non-magnified allele combined with  $bb^{158}$  would have the bobbed phenotype. The frequency of wild type cuticle among total female progeny without FM6 (i.e.  $bb^{z9}$  and  $bb^{z9-mag}/bb^{158}$ ) was scored as ‘magnification frequency’.

336

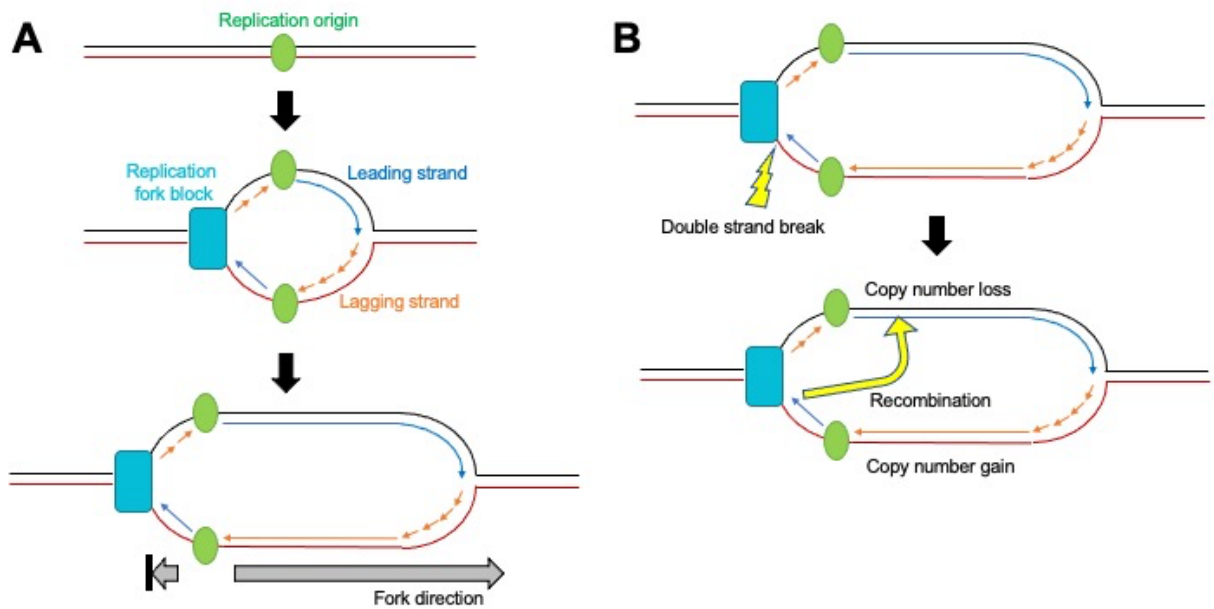

337

338

**Fig. S5. Diagram of DNA replication at rDNA loci**

339

(A) Replication fork block on one side of the replication origin leads to mostly unidirectional DNA replication at the rDNA loci. This causes one sister chromatid to be synthesized primarily as leading strand and the other as lagging strand.

342

(B) In yeast, double strand DNA breaks primarily occur on the leading strand when fork progression is prevented at the replication fork block (top). An appropriate donor for DNA repair may be found in the region of the sister chromatid replicated as leading strand. If such recombination happens, the sister chromatid mostly replicated as lagging strand (bottom strand) will gain copy number.

346

347

348 **Table S1. CO-FISH results in *D. melanogaster* rDNA deficient stocks and *D. simulans***

|                        |                                      | Outcome                             |                                     |
|------------------------|--------------------------------------|-------------------------------------|-------------------------------------|
|                        |                                      |                                     |                                     |
|                        |                                      | Y chromosome                        | X chromosome                        |
| <i>D. melanogaster</i> | wild type ( <i>yw</i> )              | 76.9%:23.1% ( $\pm 2.2\%$ ) (n=299) | 77.4%:22.6% ( $\pm 1.0\%$ ) (n=124) |
|                        | <i>Df(1)bb<sup>158</sup>/Y</i>       | 76.2%:23.8% ( $\pm 3.5\%$ ) (n=63)  | 42.4%:57.6% ( $\pm 11.9\%$ ) (n=33) |
|                        | <i>X/Df(YS)bb<sup>-</sup></i>        | 45.7%:54.3% ( $\pm 8.7\%$ ) (n=46)  | 75.5%:24.5% ( $\pm 5.7\%$ ) (n=53)  |
| <i>D. simulans</i>     | wild type ( <i>w<sup>501</sup></i> ) | 80.0%:20.0% ( $\pm 1.8\%$ ) (n=45)  | N.D.                                |

349 Probes used:

350 *D. mel* Y chromosome: **Cy3-(AATAC)<sub>6</sub>**, **Cy5-(GTATT)<sub>6</sub>**

351 *D. mel* X chromosome: **Cy3-359 forward**, **Cy5-359 reverse**

352 *D. sim* Y chromosome: **Cy5-(GTTTATT)<sub>6</sub>**, **Cy3-(AATAAAC)<sub>6</sub>**

353

354

355

356

357

358

**Table S2. CO-FISH results of Y-2 translocation chromosomes**

|                    |                            | Outcome                            |  |
|--------------------|----------------------------|------------------------------------|--|
|                    |                            |                                    |  |
|                    |                            | T(Y;2) chromosome                  |  |
| T(Y;2)A77/+;<br>XO | 2 <sup>Y</sup> (with rDNA) | 79.3%:20.7% ( $\pm 0.5\%$ ) (n=58) |  |
|                    | Y <sup>2</sup>             | N.D.                               |  |
| T(Y;2)P8/+;<br>XO  | 2 <sup>Y</sup>             | 46.6%:53.4% ( $\pm 5.8\%$ ) (n=73) |  |
|                    | Y <sup>2</sup> (with rDNA) | 78.1%:21.9% ( $\pm 9.3\%$ ) (n=32) |  |

359 Probes used:

360 T(Y;2) chromosome 2<sup>Y</sup>: **Cy5-(GTTTATT)<sub>6</sub>**, **Cy3-(AATAAAC)<sub>6</sub>**

361 T(Y;2) chromosome Y<sup>2</sup>: **Cy3-(AATAC)<sub>6</sub>**, **Cy5-(GTATT)<sub>6</sub>**

362

363

364

365 **Table S3. List of proteins that were enriched in IGS-beads pull-down**

| Gene Name      | Experiment 1 | Experiment 2 | Localized to nucleolus? | Localized to rDNA in mitosis? |
|----------------|--------------|--------------|-------------------------|-------------------------------|
| Rrp1           | 19/0         | 7/0          | N.D.                    | N.D.                          |
| CG2199/Indra   | 8/0          | 2/0          | <b>YES</b>              | <b>YES</b>                    |
| lswi           | 8/0          | 0/0          | <b>YES (16)</b>         | N.D.                          |
| D1             | 60/3         | 37/0         | <b>NO</b>               | <b>NO</b>                     |
| apt            | 9/0          | 13/0         | N.D.                    | N.D.                          |
| IleRS          | 26/0         | 11/0         | <b>NO (17)</b>          | N.D.                          |
| Dp1            | 21/0         | 9/0          | N.D.                    | N.D.                          |
| dre4           | 21/0         | 9/0          | <b>(YES)*</b>           | <b>(NO)*</b>                  |
| Dsp1           | 14/0         | 8/0          | <b>YES</b>              | <b>NO</b>                     |
| clu            | 15/0         | 7/0          | <b>NO (18)</b>          | N.D.                          |
| Hrb27C         | 14/0         | 6/0          | <b>NO (19)</b>          | N.D.                          |
| TpplI          | 20/0         | 6/0          | <b>NO (20)</b>          | N.D.                          |
| Pro $\alpha$ 3 | 6/0          | 5/0          | N.D.                    | N.D.                          |
| I(2)37Cc       | 14/2         | 5/0          | <b>NO (21)</b>          | N.D.                          |
| Cyt-c-p        | 9/0          | 5/0          | <b>NO (22)</b>          | N.D.                          |
| RpL8           | 9/2          | 5/0          | <b>YES (23)</b>         | N.D.                          |
| CG3995         | 5/0          | 5/0          | <b>NO</b>               | <b>NO</b>                     |
| TFAM           | 25/4         | 24/4         | <b>NO (24)</b>          | N.D.                          |

366  
 367 \* As no reagents to visualize the localization of dre4, which is a component of the FACT  
 368 complex, were available, the localization of SSRP1 (another component of the FACT complex)  
 369 was used when deciding whether or not to follow up dre4 in this study.

370  
 371 Data are shown as peptide counts in IGS beads/control beads.  
 372

373 **Table S4. CO-FISH results upon knockdown of *indra***

|                                                                              | Outcome                    |                            |
|------------------------------------------------------------------------------|----------------------------|----------------------------|
|                                                                              | Y chromosome               | X chromosome               |
| <i>indra</i> <sup>TRiP.HMJ30228</sup> control*                               | 75.0%:25.0% (±2.6%) (n=40) | 80.0%:20.0% (±1.7%) (n=30) |
| <i>tub-gal80<sup>ts</sup>, nos-gal4ΔVP16&gt;UAS-indra<sup>HMJ30228</sup></i> | 40.0%:60.0% (±0.0%) (n=30) | 43.6%:56.4% (±9.6%) (n=39) |
| <i>indra</i> <sup>GD9748</sup> control<br>( <i>nos-gal4&gt;UAS-Dcr-2</i> )   | 76.9%:23.1% (±7.4%) (n=26) | 76.9%:23.1% (±7.9%) (n=39) |
| <i>nos-gal4&gt;UAS-indra<sup>GD9748</sup>, UAS-Dcr-2</i>                     | 42.9%:57.1% (±2.1%) (n=28) | 43.2%:56.8% (±7.5%) (n=44) |

374 Probes used:

375 Y chromosome: **Cy3-(AATAC)<sub>6</sub>**, **Cy5-(GTATT)<sub>6</sub>**

376 X chromosome: **Cy3-359 forward**, **Cy5-359 reverse**

377 \*: Cross siblings of *tub-gal80<sup>ts</sup>, nos-gal4ΔVP16>UAS-indra<sup>TRiP.HMJ30228</sup>* that do not express

378 *indra<sup>HMJ30228</sup>* (either *nos-gal4ΔVP16* only or *UAS-indra<sup>TRiP.HMJ30228</sup>* only) were used as control

379

380

381

**Table S5. CO-FISH results of X chromosome in magnifying condition**

|                                                          |      | Outcome                     |  |
|----------------------------------------------------------|------|-----------------------------|--|
|                                                          |      | X chromosome                |  |
| Non-magnifying<br>( <i>yw</i> )                          | TAGA | 87.5%:12.5% (±11.3%) (n=32) |  |
|                                                          | 359  | 81.1%:18.9% (±0.9%) (n=37)  |  |
| Magnifying<br>( <i>bb<sup>29</sup>/Ybb<sup>+</sup></i> ) | TAGA | 53.3%:46.7% (±4.7%) (n=45)  |  |
|                                                          | 359  | 74.2%:25.8% (±7.7%) (n=31)  |  |

382 Probes used:

383 (TAGA)<sub>n</sub>: **Cy3-(TAGA)<sub>8</sub>**, **Cy5-(TCTA)<sub>8</sub>**

384 (359)<sub>n</sub>: **Cy3-359 forward**, **Cy5-359 reverse**

385

386

387

388

389

390



391 **Table S6. Probe sequences for CO-FISH and DNA FISH**

| Probe target                        | 5'-sequence-3'                                                                   | Source or reference | Related figure               |
|-------------------------------------|----------------------------------------------------------------------------------|---------------------|------------------------------|
| (AATAC) <sub>n</sub><br>(forward)   | Cy3-(AATAC) <sub>6</sub>                                                         | (8)                 | Fig. 1, B-D,<br>Fig. 2F      |
| (AATAC) <sub>n</sub><br>(reverse)   | Cy5-(GTATT) <sub>6</sub>                                                         |                     | Fig. 1, B-D,<br>Fig. 2F      |
| 359-bp<br>(forward)                 | Cy3-<br>CCACATTTTGCAAATTTTGATGACCCCCCTCCTTACAAAAAT<br>GCG                        |                     | Fig. 1C, Fig.<br>2F, Fig. 4G |
| 359-bp<br>(reverse)                 | Cy5-<br>AGGATTTAGGGAAATTAATTTTTGGATCAATTTTCGCATTTTTT<br>GTAAG                    |                     | Fig. 1C, Fig.<br>2F, Fig. 4G |
| (AATAAAC) <sub>n</sub><br>(forward) | Cy3-(AATAAAC) <sub>6</sub>                                                       | This study          | Fig. 1D,<br>fig. S1B         |
| (AATAAAC) <sub>n</sub><br>(reverse) | Cy5-(GTTTATT) <sub>6</sub>                                                       | (25)                | Fig. 1D,<br>fig. S1B         |
| (TAGA) <sub>n</sub><br>(forward)    | Cy3-(TAGA) <sub>8</sub>                                                          | (25)                | Fig. 4G                      |
| (TAGA) <sub>n</sub><br>(reverse)    | Cy5-(TCTA) <sub>8</sub>                                                          | This study          | Fig. 4G                      |
| 240-bp IGS                          | Cy5-<br>TCCATTCACTAAAATGGCTTTTCTCTATAATACTTAGAGAATAT<br>GGGAATATTTCAACATTTTTCACT | (26)                | Fig. 4, C-E                  |

392  
393  
394  
395  
396  
397

**Table S7: Primer and probe sequences for Real-Time PCR and Droplet-Digital PC**

| Primer name              | 5'-sequence-3'              | Source or reference |            |
|--------------------------|-----------------------------|---------------------|------------|
| rt-5S rDNA (forward)     | AAGTTGTGGACGAGGCCAAC        | (27)                |            |
| rt-5S rDNA (reverse)     | CGGTTCTCGTCCGATCACCGA       |                     |            |
| rt-IGS #1 (forward)      | GCTGTTCTACGACAGAGGGTTC      |                     |            |
| rt-IGS #1 (reverse)      | CAATATGAGAGGTCGGCAACCAC     |                     |            |
| rt-IGS #2 (forward)      | GGTAGGCAGTGGTTGCCG          |                     |            |
| rt-IGS #2 (reverse)      | GGAGCCAAGTCCCGTGTTTC        |                     |            |
| rt-ETS (forward)         | ATTACCTGCCTGTAAAGTTGG       |                     |            |
| rt-ETS (reverse)         | CCGAGCGCACATGATAATTCTTCC    |                     |            |
| rt-18S rDNA<br>(forward) | TTCTGGTTGATCCTGCCAGTAG      |                     |            |
| rt-18S rDNA<br>(reverse) | CGTGTGTACTIONTAGACATGCATGGC |                     |            |
| rt-28S rDNA<br>(forward) | CCTCAACTCATATGGGACTACC      |                     | This study |
| rt-28S rDNA<br>(reverse) | CACTGCATCTCACATTTGCC        |                     |            |
| dd-RpL32 (forward)       | GCTTCAAGGGACAGTATCTG        |                     | (10)       |
| dd-RpL32 (reverse)       | AACGCGGTTCTGCATGAG          |                     |            |

|                   |                                                  |  |
|-------------------|--------------------------------------------------|--|
| dd-RpL32 (probe)  | <b>HEX-ATGCCCAACATCGGTTAC-Iowa Black FQ</b>      |  |
| dd-28S (forward)  | GAGCTGCCATTGGTACAG                               |  |
| dd-28S (reverse)  | GCTTTCGCCTTGAACCTAG                              |  |
| dd-28S (probe)    | <b>HEX-TGGTGGATAGTAGCAAATAATCG-Iowa Black FQ</b> |  |
| dd-Upf1 (forward) | CACACTTTATGTCCACCATTATTG                         |  |
| dd-Upf1 (reverse) | GAGTTTCCGTAGGGACCAC                              |  |
| dd-Upf1 (probe)   | <b>HEX-CCGTAACCGCCACTGCGGT-Iowa Black FQ</b>     |  |

398

399 **References**

400

- 401 1. M. Van Doren, A. L. Williamson, R. Lehmann, Regulation of zygotic gene expression in  
402 *Drosophila* primordial germ cells. *Curr Biol* **8**, 243-246 (1998).
- 403 2. M. P. Zeidler, N. Perrimon, D. I. Strutt, Polarity determination in the *Drosophila* eye: a  
404 novel role for unpaired and JAK/STAT signaling. *Genes Dev* **13**, 1342-1353 (1999).
- 405 3. S. E. McGuire, P. T. Le, A. J. Osborn, K. Matsumoto, R. L. Davis, Spatiotemporal rescue  
406 of memory dysfunction in *Drosophila*. *Science* **302**, 1765-1768 (2003).
- 407 4. M. Inaba, M. Buszczak, Y. M. Yamashita, Nanotubes mediate niche-stem-cell signalling  
408 in the *Drosophila* testis. *Nature* **523**, 329-332 (2015).
- 409 5. M. Zaccai, H. D. Lipshitz, Differential distributions of two adducin-like protein isoforms  
410 in the *Drosophila* ovary and early embryo. *Zygote* **4**, 159-166 (1996).
- 411 6. B. Riggelman, P. Schedl, E. Wieschaus, Spatial expression of the *Drosophila* segment  
412 polarity gene *armadillo* is posttranscriptionally regulated by *wingless*. *Cell* **63**, 549-560  
413 (1990).
- 414 7. M. Jagannathan, R. Cummings, Y. M. Yamashita, A conserved function for  
415 pericentromeric satellite DNA. *Elife* **7**, (2018).
- 416 8. S. Yadlapalli, Y. M. Yamashita, Chromosome-specific nonrandom sister chromatid  
417 segregation during stem-cell division. *Nature* **498**, 251-254 (2013).
- 418 9. A. M. Huang, E. J. Rehm, G. M. Rubin, Quick preparation of genomic DNA from  
419 *Drosophila*. *Cold Spring Harb Protoc* **2009**, pdb prot5198 (2009).
- 420 10. J. O. Nelson, A. Slicko, Y. M. Yamashita, The retrotransposon R2 maintains *Drosophila*  
421 ribosomal DNA repeats. *bioRxiv*, 2021.2007.2012.451825 (2021).
- 422 11. Y. Akamatsu, T. Kobayashi, The Human RNA Polymerase I Transcription Terminator  
423 Complex Acts as a Replication Fork Barrier That Coordinates the Progress of Replication  
424 with rRNA Transcription Activity. *Mol Cell Biol* **35**, 1871-1881 (2015).
- 425 12. T. Kobayashi, Ribosomal RNA gene repeats, their stability and cellular senescence. *Proc*  
426 *Jpn Acad Ser B Phys Biol Sci* **90**, 119-129 (2014).
- 427 13. M. D. Burkhalter, J. M. Sogo, rDNA enhancer affects replication initiation and mitotic  
428 recombination: Fob1 mediates nucleolytic processing independently of replication. *Mol*  
429 *Cell* **15**, 409-421 (2004).
- 430 14. T. Akera, E. Trimm, M. A. Lampson, Molecular Strategies of Meiotic Cheating by  
431 Selfish Centromeres. *Cell* **178**, 1132-1144 e1110 (2019).
- 432 15. R. Ranjan, J. Snedeker, X. Chen, Asymmetric Centromeres Differentially Coordinate  
433 with Mitotic Machinery to Ensure Biased Sister Chromatid Segregation in Germline  
434 Stem Cells. *Cell Stem Cell* **25**, 666-681 e665 (2019).
- 435 16. A. V. Emelyanov *et al.*, Identification and characterization of ToRC, a novel ISWI-  
436 containing ATP-dependent chromatin assembly complex. *Genes Dev* **26**, 603-614 (2012).
- 437 17. J. Lu, S. J. Marygold, W. H. Gharib, B. Suter, The aminoacyl-tRNA synthetases of  
438 *Drosophila melanogaster*. *Fly (Austin)* **9**, 53-61 (2015).
- 439 18. R. T. Cox, A. C. Spradling, Clueless, a conserved *Drosophila* gene required for  
440 mitochondrial subcellular localization, interacts genetically with parkin. *Dis Model Mech*  
441 **2**, 490-499 (2009).
- 442 19. M. J. Matunis, E. L. Matunis, G. Dreyfuss, Isolation of hnRNP complexes from  
443 *Drosophila melanogaster*. *J Cell Biol* **116**, 245-255 (1992).

- 444 20. S. C. Renn, B. Tomkinson, P. H. Taghert, Characterization and cloning of tripeptidyl  
445 peptidase II from the fruit fly, *Drosophila melanogaster*. *J Biol Chem* **273**, 19173-19182  
446 (1998).
- 447 21. S. J. Lee, R. Feldman, P. H. O'Farrell, An RNA interference screen identifies a novel  
448 regulator of target of rapamycin that mediates hypoxia suppression of translation in  
449 *Drosophila* S2 cells. *Mol Biol Cell* **19**, 4051-4061 (2008).
- 450 22. L. Dorstyn, K. Mills, Y. Lazebnik, S. Kumar, The two cytochrome c species, DC3 and  
451 DC4, are not required for caspase activation and apoptosis in *Drosophila* cells. *J Cell Biol*  
452 **167**, 405-410 (2004).
- 453 23. K. N. Rugjee *et al.*, Fluorescent protein tagging confirms the presence of ribosomal  
454 proteins at *Drosophila* polytene chromosomes. *PeerJ* **1**, e15 (2013).
- 455 24. K. Takata *et al.*, *Drosophila* mitochondrial transcription factor A: characterization of its  
456 cDNA and expression pattern during development. *Biochem Biophys Res Commun* **287**,  
457 474-483 (2001).
- 458 25. M. Jagannathan, N. Warsinger-Pepe, G. J. Watase, Y. M. Yamashita, Comparative  
459 Analysis of Satellite DNA in the *Drosophila melanogaster* Species Complex. *G3*  
460 (*Bethesda*) **7**, 693-704 (2017).
- 461 26. K. L. Lu, J. O. Nelson, G. J. Watase, N. Warsinger-Pepe, Y. M. Yamashita,  
462 Transgenerational dynamics of rDNA copy number in *Drosophila* male germline stem  
463 cells. *Elife* **7**, (2018).
- 464 27. Q. Zhang, N. A. Shalaby, M. Buszczak, Changes in rRNA transcription influence  
465 proliferation and cell fate within a stem cell lineage. *Science* **343**, 298-301 (2014).  
466
